# Supplementary material for: Impact of physical activity level on adult gut microbiome composition and metabolic function
Source: Research Square preprint supplement (doi:10.21203/rs.3.rs-7595052/v1), 2025-10-07
Supplement: Supplementary file 1 [file be9e76d66e45ae35cda6b45e.docx]

SUPPLEMENTARY MATERIAL


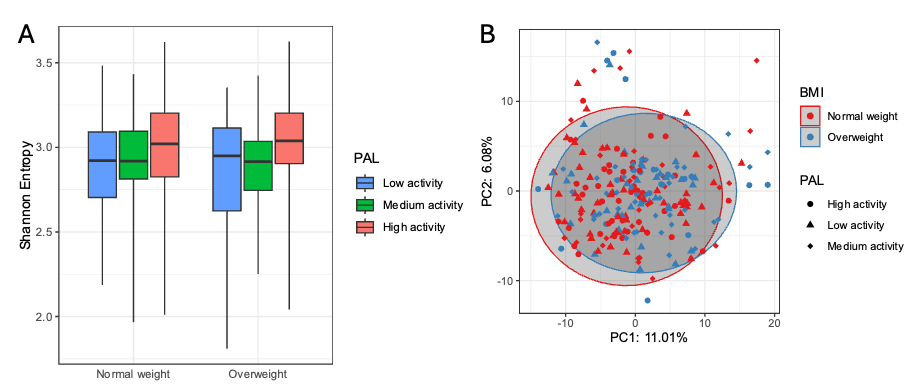


**Supplementary Figure 1. Representation of diversity in relation to PALs.** The bars represent the PAL: low activity (blue), medium activity (green), and high activity (red). The PALs were categorized based on the BMI of the participants (normal weight and overweight). The Wilcoxon test was utilized to evaluate statistical differences between the groups. The results indicate no significant differences in Shannon diversity among the various PALs, suggesting a similarity in microbial diversity irrespective of the individuals' levels of physical activity.
